# Supplementary material for: Insights into soybean transcriptome reconfiguration under hypoxic stress: Functional, regulatory, structural, and compositional characterization
Source: PubMed Central journal article supplement (PMC5690659; doi:10.1371/journal.pone.0187920), 2017-11-16
Supplement: pone.0187920.s001.pdf [file pone.0187920.s001.pdf]

## **S1 Supporting Information**

### **Insights into soybean transcriptome reconfiguration under hypoxic stress: functional, regulatory, structural, and compositional characterization**

Thiago J. Nakayama<sup>1</sup>, Fabiana A. Rodrigues<sup>2</sup>, Norman Neumaier<sup>2</sup>, Juliana Marcolino-Gomes<sup>2</sup>, Hugo B. C. Molinari<sup>3</sup>, Thaís R. Santiago<sup>3</sup>, Eduardo F. Formighieri<sup>3</sup>, Marcos F. Basso<sup>3</sup>, José R. B. Farias<sup>2</sup>, Beatriz M. Emygdio<sup>4</sup>, Ana C. B. de Oliveira<sup>4</sup>, Ângela D. Campos<sup>4</sup>, Aluizio Borém<sup>1</sup>, Frank G. Harmon<sup>5</sup>, Liliane M. Mertz-Henning<sup>2</sup>, Alexandre L. Nepomuceno<sup>2\*</sup>

<sup>1</sup>Departamento de Fitotecnia, Universidade Federal de Viçosa, Viçosa, Minas Gerais, Brazil

<sup>2</sup>Embrapa Soja, Empresa Brasileira de Pesquisa Agropecuária, Londrina, Paraná, Brazil

<sup>3</sup>Embrapa Agroenergia, Empresa Brasileira de Pesquisa Agropecuária, Brasília, Distrito Federal, Brazil

<sup>4</sup>Embrapa Clima Temperado, Empresa Brasileira de Pesquisa Agropecuária, Pelotas, Rio Grande do Sul, Brazil

<sup>5</sup>Department of Plant and Microbial Biology, University of California-Berkeley, Berkeley, California, USA

\*Corresponding author  
alexandre.nepomuceno@embrapa.br (ALN)

## **S1 Supporting Information**

**Table A. Samples sizes used for structural and compositional analysis among groups of genes.**

**Table B. Fisher's pairwise comparisons between gene groups.**

**Table C. Mann-Whitney pairwise comparisons.**

**Table D. Primer pairs used in the study.**

**Fig A. KEGG pathways showing transcriptional changes for amino acids and derivative metabolic process in both Embrapa 45 and BR 4 soybean cultivars.**

**Fig B. Structural divergence of non-symbiotic hemoglobin Glyma11g12980.1 transcript between BR 4 and Embrapa 45 cultivars by mapping (A) and *de novo* assembly (B) of reads.**

**Fig C. Steady-state stable mRNAs tend to be translationally down-regulated (A), decreasing their association with ribosomes (of which include RPL18 component) by their sequestration into stress granules (ribonucleoprotein complexes including UBP1C) under hypoxia, whereas upon reoxygenation they are rapidly released from stress granules forming new polyribosomes (B).**

**Fig D. Compositional features for full (normalized to 90 nucleotides), start, middle, and end 90 nucleotides length from coding sequences from different soybean gene groups.**

**Fig E. Heat map of RSCU (Relative Synonymous Codon Usage) for full, first, middle, and last 30 CDS (coding sequence) codons length from different soybean gene groups.**

**Table A. Samples sizes used for structural and compositional analysis among groups of genes.**

| gene groups  | promotor cis elements | gene structure | CDS   |                             |                        |                             |
|--------------|-----------------------|----------------|-------|-----------------------------|------------------------|-----------------------------|
|              |                       |                | CpG   |                             | C1pG2, C2pG3, C3pG1    |                             |
|              |                       |                | full  | start 90, middle 90, end 90 | full                   | start 90, middle 90, end 90 |
| U40          | 40                    | 40             | 40    | 34                          | 40                     | 34                          |
| U500         | 381                   | 500            | 500   | 424                         | 500                    | 424                         |
| D40          | 40                    | 40             | 40    | 37                          | 40                     | 37                          |
| D500         | 386                   | 500            | 500   | 467                         | 500                    | 467                         |
| Genome       | ---                   | 54174          | 54174 | 46644                       | 10835                  | 9329                        |
| S40          | 40                    | 40             | 40    | 38                          | 40                     | 38                          |
| S500         | 352                   | 500            | 500   | 490                         | 500                    | 490                         |
|              |                       |                |       |                             |                        |                             |
| genes groups | promotor cis elements | gene structure | CDS   |                             |                        |                             |
|              |                       |                | G+C   |                             | C1, C2, C3, G1, G2, G3 |                             |
|              |                       |                | full  | start 90, middle 90, end 90 | full                   | start 90, middle 90, end 90 |
| U40          | 40                    | 40             | 40    | 34                          | 40                     | 34                          |
| U500         | 381                   | 500            | 500   | 424                         | 500                    | 424                         |
| D40          | 40                    | 40             | 40    | 37                          | 40                     | 37                          |
| D500         | 386                   | 500            | 500   | 467                         | 500                    | 467                         |
| Genome       | ---                   | 54174          | 54174 | 46644                       | 10835                  | 9329                        |
| S40          | 40                    | 40             | 40    | 38                          | 40                     | 38                          |
| S500         | 352                   | 500            | 500   | 490                         | 500                    | 490                         |

**Table B. Fisher's pairwise comparisons between gene groups.**

|              | Promoters (%) with                 |             |             |             |                 | Genes (%)   |                         |
|--------------|------------------------------------|-------------|-------------|-------------|-----------------|-------------|-------------------------|
|              | Consensus TATA-Box<br>TATA(T/A)ATA | P\$ABRE     | P\$DREB     | ABRE >1     | P\$ABRE+P\$DREB | Intronless  | Alternative<br>splicing |
| U40 vs D40   | 0.82                               | <b>0.00</b> | 0.12        | 0.08        | <b>0.01</b>     | 0.82        | 1.00                    |
| U40 vs S40   | <b>0.00</b>                        | 0.26        | 0.37        | 0.80        | 0.46            | <b>0.00</b> | <b>0.00</b>             |
| D40 vs S40   | <b>0.00</b>                        | 0.11        | 0.65        | 0.22        | 0.07            | <b>0.00</b> | <b>0.00</b>             |
| U500 vs D500 | 1.00                               | 0.04        | <b>0.00</b> | 0.05        | <b>0.00</b>     | 0.89        | <b>0.01</b>             |
| U500 vs S500 | <b>0.00</b>                        | <b>0.00</b> | 0.51        | <b>0.00</b> | 0.15            | <b>0.00</b> | <b>0.00</b>             |
| D500 vs S500 | <b>0.00</b>                        | 0.30        | <b>0.00</b> | 0.06        | 0.07            | <b>0.00</b> | <b>0.00</b>             |

**Table C. Mann-Whitney pairwise comparisons.**

|              | <b>Introns number</b> | <b>Gene length (pb)</b> | <b>CDS length (pb)</b> |
|--------------|-----------------------|-------------------------|------------------------|
| U40 vs D40   | 0.04                  | 0.74                    | 0.26                   |
| S40 vs U40   | <b>0.00</b>           | <b>0.00</b>             | <b>0.00</b>            |
| S40 vs D40   | <b>0.00</b>           | <b>0.00</b>             | <b>0.01</b>            |
| U500 vs D500 | 0.46                  | 0.02                    | <b>0.00</b>            |
| S500 vs U500 | <b>0.00</b>           | <b>0.00</b>             | <b>0.00</b>            |
| S500 vs D500 | <b>0.00</b>           | <b>0.00</b>             | <b>0.00</b>            |

|              | <b>CDS G+C norm 90</b> | <b>Start 90 G+C</b> | <b>Middle 90 G+C</b> | <b>End 90 G+C</b> |
|--------------|------------------------|---------------------|----------------------|-------------------|
| U40 vs D40   | 0.71                   | 0.15                | 0.34                 | 0.27              |
| S40 vs U40   | 0.01                   | 0.27                | <b>0.00</b>          | 0.69              |
| S40 vs D40   | 0.08                   | 0.04                | 0.05                 | 0.51              |
| U500 vs D500 | <b>0.00</b>            | 0.54                | 0.02                 | 0.02              |
| S500 vs U500 | 0.09                   | <b>0.00</b>         | <b>0.00</b>          | <b>0.00</b>       |
| S500 vs D500 | <b>0.00</b>            | <b>0.00</b>         | <b>0.00</b>          | 0.55              |

|              | <b>CDS CpG norm 90</b> | <b>Start 90 CpG</b> | <b>Middle 90 CpG</b> | <b>End 90 CpG</b> |
|--------------|------------------------|---------------------|----------------------|-------------------|
| U40 vs D40   | 0.53                   | 0.65                | 0.82                 | 0.10              |
| S40 vs U40   | 0.98                   | <b>0.00</b>         | 0.16                 | 0.45              |
| S40 vs D40   | 0.53                   | <b>0.00</b>         | 0.62                 | 0.29              |
| U500 vs D500 | 0.58                   | <b>0.00</b>         | 0.51                 | 0.13              |
| S500 vs U500 | 0.09                   | <b>0.00</b>         | <b>0.00</b>          | 0.93              |
| S500 vs D500 | 0.35                   | <b>0.00</b>         | <b>0.00</b>          | 0.10              |

Table C. (continued).

|              | CDS norm 90 |       |             | Start 90    |             |             | Middle 90   |             |             | End 90      |       |             |
|--------------|-------------|-------|-------------|-------------|-------------|-------------|-------------|-------------|-------------|-------------|-------|-------------|
|              | C1pG2       | C2pG3 | C3pG1       | C1pG2       | C2pG3       | C3pG1       | C1pG2       | C2pG3       | C3pG1       | C1pG2       | C2pG3 | C3pG1       |
| U40 vs D40   | 0.89        | 0.59  | 0.54        | 0.76        | 0.31        | 0.50        | 0.66        | 0.14        | 0.43        | 0.38        | 0.26  | 0.75        |
| S40 vs U40   | <b>0.00</b> | 0.23  | 0.18        | <b>0.00</b> | 0.10        | 0.11        | 0.52        | 0.96        | 0.03        | 0.19        | 0.03  | 0.53        |
| S40 vs D40   | <b>0.01</b> | 0.93  | 0.50        | <b>0.00</b> | 0.02        | 0.21        | 0.88        | 0.11        | 0.17        | 0.03        | 0.20  | 0.82        |
| U500 vs D500 | 0.02        | 0.99  | 0.06        | 0.06        | 0.04        | 0.20        | <b>0.00</b> | 0.23        | 0.99        | 0.10        | 0.11  | 0.50        |
| S500 vs U500 | <b>0.00</b> | 0.06  | 0.02        | <b>0.00</b> | <b>0.00</b> | <b>0.00</b> | 0.86        | <b>0.00</b> | <b>0.00</b> | <b>0.00</b> | 0.01  | 0.04        |
| S500 vs D500 | <b>0.00</b> | 0.08  | <b>0.00</b> | <b>0.00</b> | <b>0.00</b> | <b>0.00</b> | <b>0.00</b> | <b>0.00</b> | <b>0.00</b> | <b>0.00</b> | 0.34  | <b>0.01</b> |

|      | Start 90 G+C vs Middle 90 G+C | Start 90 G+C vs End 90 G+C | Middle 90 G+C vs End 90 G+C |
|------|-------------------------------|----------------------------|-----------------------------|
| S40  | <b>0.00</b>                   | <b>0.01</b>                | 0.22                        |
| D40  | 0.77                          | 0.22                       | 0.11                        |
| U40  | 0.34                          | 0.02                       | <b>0.01</b>                 |
| S500 | <b>0.00</b>                   | <b>0.00</b>                | <b>0.01</b>                 |
| D500 | 0.34                          | <b>0.00</b>                | <b>0.00</b>                 |
| U500 | 0.04                          | <b>0.00</b>                | <b>0.00</b>                 |

|      | Start 90 CpG vs Middle 90 CpG | Start 90 CpG vs End 90 CpG | Middle 90 CpG vs End 90 CpG |
|------|-------------------------------|----------------------------|-----------------------------|
| S40  | <b>0.00</b>                   | <b>0.00</b>                | 0.60                        |
| D40  | 0.61                          | 0.19                       | 0.12                        |
| U40  | 0.61                          | 0.65                       | 0.22                        |
| S500 | <b>0.00</b>                   | <b>0.00</b>                | 0.03                        |
| D500 | 0.09                          | 0.05                       | <b>0.00</b>                 |
| U500 | 0.59                          | <b>0.00</b>                | <b>0.00</b>                 |

**Table C. (continued).**

|              | CDS norm 90 |             |             |             |             |             | First 90 |      |      |      |             |      |
|--------------|-------------|-------------|-------------|-------------|-------------|-------------|----------|------|------|------|-------------|------|
|              | C1          | G2          | C2          | G3          | C3          | G1          | C1       | G2   | C2   | G3   | C3          | G1   |
| U40 vs D40   | 0.72        | 0.62        | 0.84        | 0.75        | 0.64        | 0.54        | 0.53     | 0.52 | 0.98 | 0.57 | 0.97        | 0.06 |
| S40 vs U40   | 0.35        | 0.77        | 0.70        | 0.10        | <b>0.00</b> | 0.73        | 0.49     | 0.53 | 0.77 | 0.05 | 0.73        | 0.13 |
| S40 vs D40   | 0.62        | 0.95        | 0.70        | 0.04        | <b>0.00</b> | 0.31        | 0.98     | 0.27 | 0.92 | 0.07 | 0.87        | 0.46 |
| U500 vs D500 | <b>0.00</b> | <b>0.00</b> | <b>0.00</b> | <b>0.01</b> | <b>0.00</b> | 0.77        | 0.14     | 0.85 | 0.02 | 0.08 | <b>0.00</b> | 0.10 |
| S500 vs U500 | <b>0.00</b> | 0.22        | 0.75        | 0.23        | <b>0.00</b> | <b>0.00</b> | 0.45     | 0.82 | 0.03 | 0.90 | 0.28        | 0.15 |
| S500 vs D500 | 0.13        | 0.05        | <b>0.00</b> | 0.07        | <b>0.00</b> | <b>0.00</b> | 0.48     | 0.66 | 0.82 | 0.08 | 0.05        | 0.83 |

  

|              | Middle 90   |      |      |             |             |             | End 90 |             |      |      |             |             |
|--------------|-------------|------|------|-------------|-------------|-------------|--------|-------------|------|------|-------------|-------------|
|              | C1          | G2   | C2   | G3          | C3          | G1          | C1     | G2          | C2   | G3   | C3          | G1          |
| U40 vs D40   | <b>0.01</b> | 0.16 | 0.04 | <b>0.00</b> | <b>0.01</b> | 0.68        | 0.38   | 0.39        | 0.84 | 0.14 | 0.07        | 0.06        |
| S40 vs U40   | 0.08        | 0.63 | 0.05 | 0.14        | <b>0.00</b> | 0.20        | 0.18   | 0.01        | 0.49 | 0.37 | 0.01        | 0.04        |
| S40 vs D40   | 0.35        | 0.26 | 0.95 | 0.02        | <b>0.00</b> | 0.35        | 0.61   | 0.23        | 0.33 | 0.58 | <b>0.00</b> | <b>0.00</b> |
| U500 vs D500 | 0.84        | 0.29 | 0.05 | 0.50        | 0.10        | 0.87        | 0.62   | 0.68        | 0.77 | 0.76 | 0.02        | 0.89        |
| S500 vs U500 | 0.13        | 0.77 | 0.42 | 0.56        | <b>0.00</b> | <b>0.01</b> | 0.42   | <b>0.00</b> | 0.06 | 1.00 | <b>0.00</b> | <b>0.00</b> |
| S500 vs D500 | 0.18        | 0.44 | 0.25 | 0.22        | <b>0.00</b> | 0.01        | 0.73   | <b>0.00</b> | 0.03 | 0.74 | <b>0.00</b> | <b>0.00</b> |

**Table D. Primer pairs used in the study.**

| <b>Name</b>        | <b>Gene locus</b> | <b>Forward primer sequence</b> | <b>Reverse primer sequence</b> |
|--------------------|-------------------|--------------------------------|--------------------------------|
| SUSY               | Glyma13g17420     | TGTTGTTGCATGATTTGGATCTTG       | CACGGCTTAAAATTGAATTGATGG       |
| NR                 | Glyma06g11430     | AATCCCATGCAAGCTCATCTCC         | CAAACCCATGAGTAGGTCGTCCG        |
| nsHB               | Glyma11g12980     | TGAAACCACCCTCCTCTTAGACTCC      | GAATGCGAAACACTTCCCAACC         |
| AOX                | Glyma04g14800     | CTTCTTGGGGTATTTGTTGTACCT       | ATTGCCCTTGTCCAGCTCCTTA         |
| APX                | Glyma12g07780     | CACGGTGCCCATATAATTTCTCTC       | CAACCCAACTCCAATCATCATCAC       |
| TPS                | Glyma17g07530     | TGCGTAACAGCAATCTTTCAACAA       | CCCAAGACCTAATCCACCAACC         |
| ELF1B <sup>A</sup> | Glyma02g44460     | GTTGAAAAGCCAGGGGACA            | TCTTACCCCTTGAGCGTGG            |
| ACTB <sup>B</sup>  | Glyma15g05570     | GAGCTATGAATTGCCTGATGG          | CGTTTCATGAATTCCAGTAGC          |

Primers obtained from: A [100], B [101].



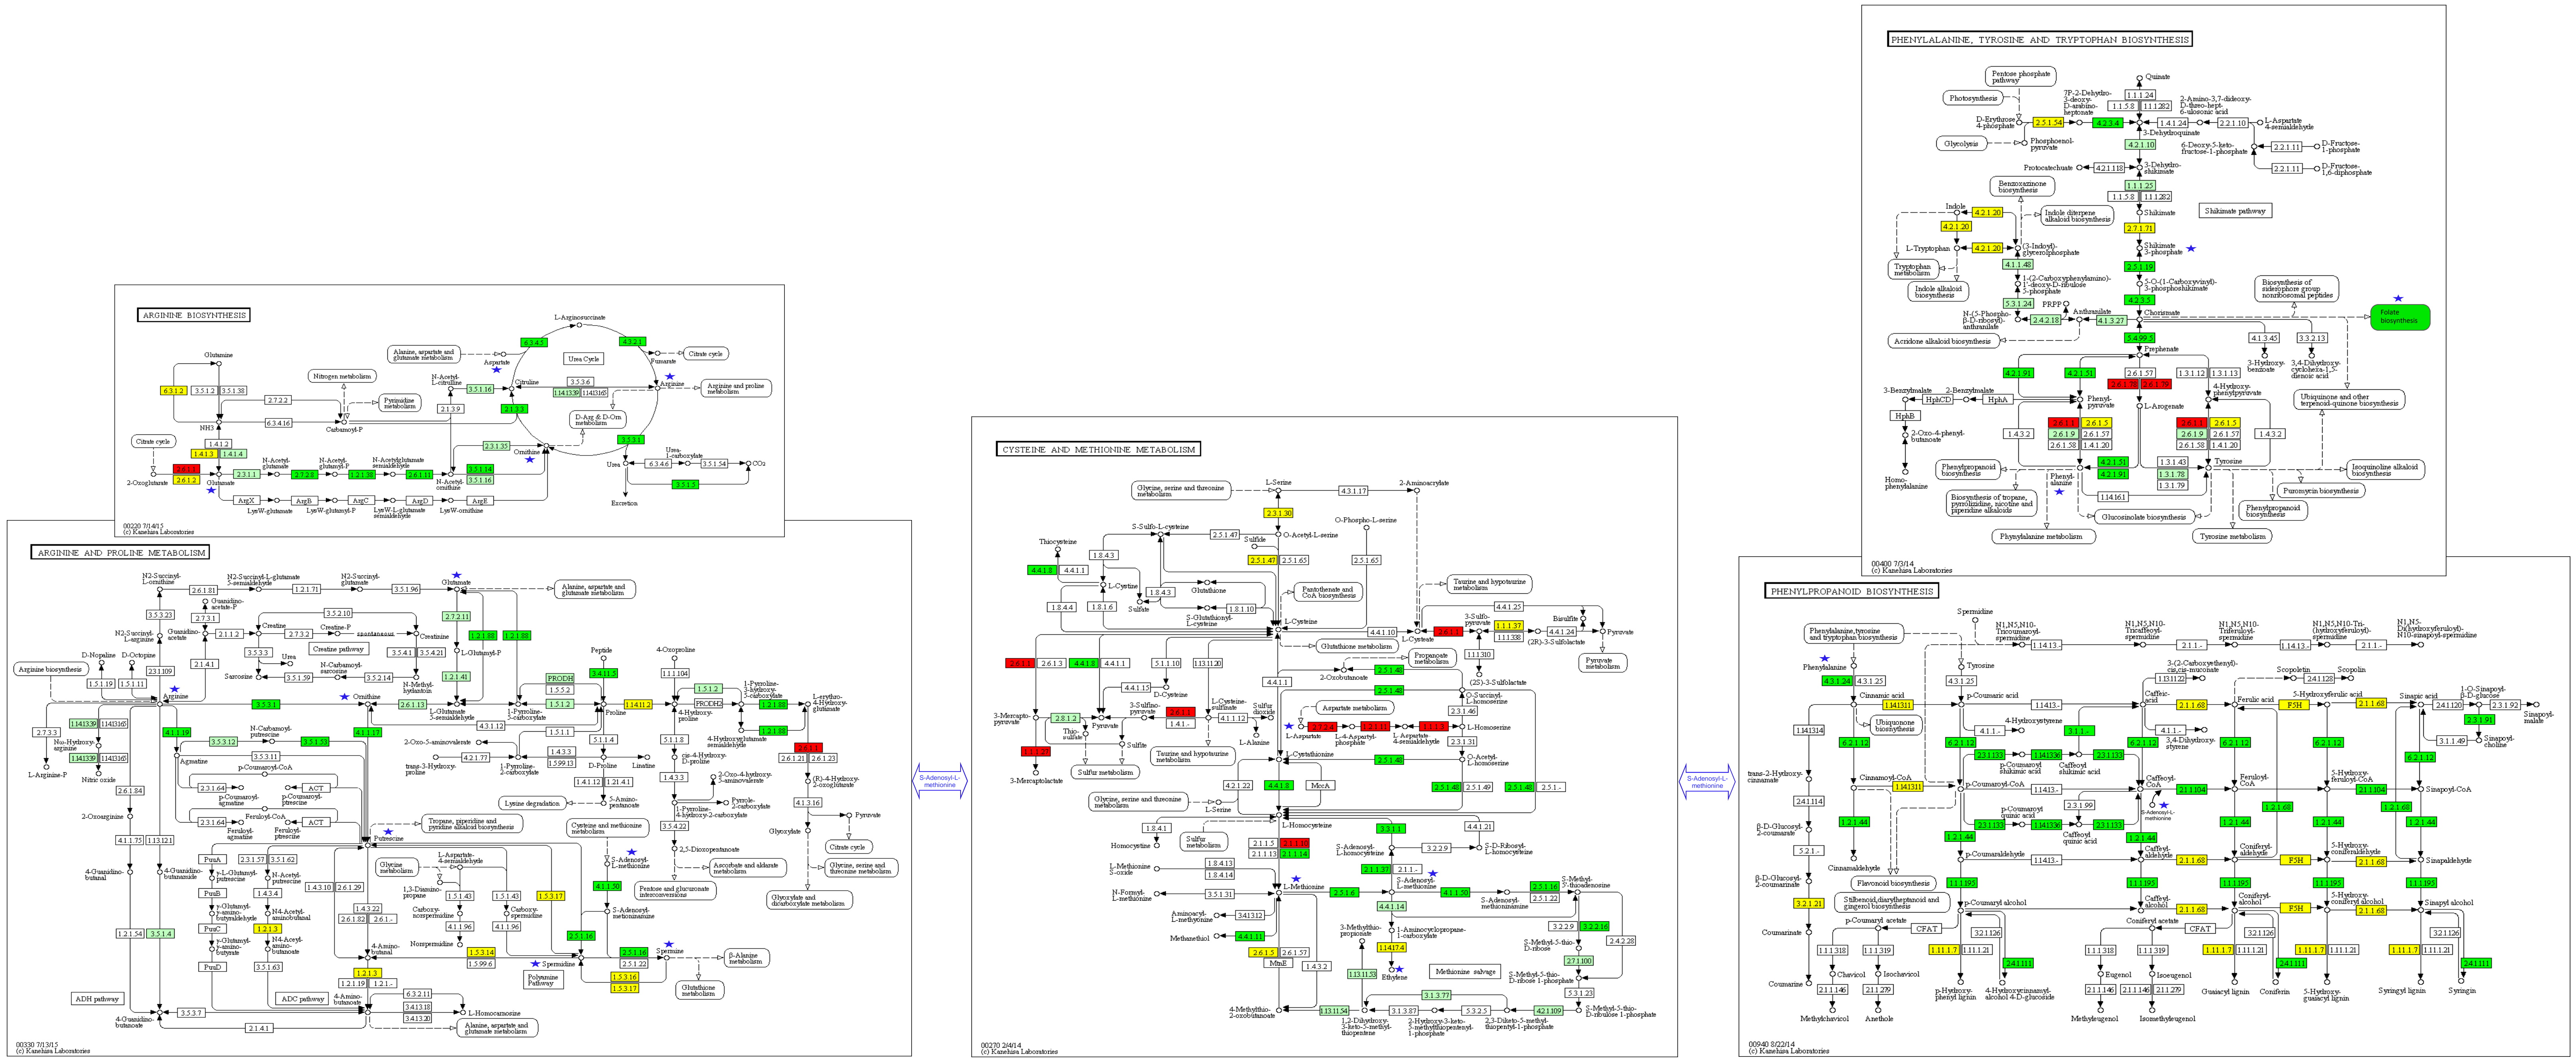

**Fig A. KEGG pathways showing transcriptional changes for amino acids and derivative metabolic process in both Embrapa 45 and BR 4 soybean cultivars.** Oriented by blue star icons, although up-regulation (red boxes) of some Asp catabolic related genes, many down-stream related genes were down-regulated (green boxes), highlighting those involved in S-adenosyl-L-methionine, polyamines, and phenylpropanoid biosynthesis. Shikimate and folate biosynthesis related genes were also down-regulated. Yellow boxes represent paralogs with opposite transcriptional responses, and whitish-green boxes represent soybean genes not differentially expressed.

A) Read mapping with BWA-MEM.

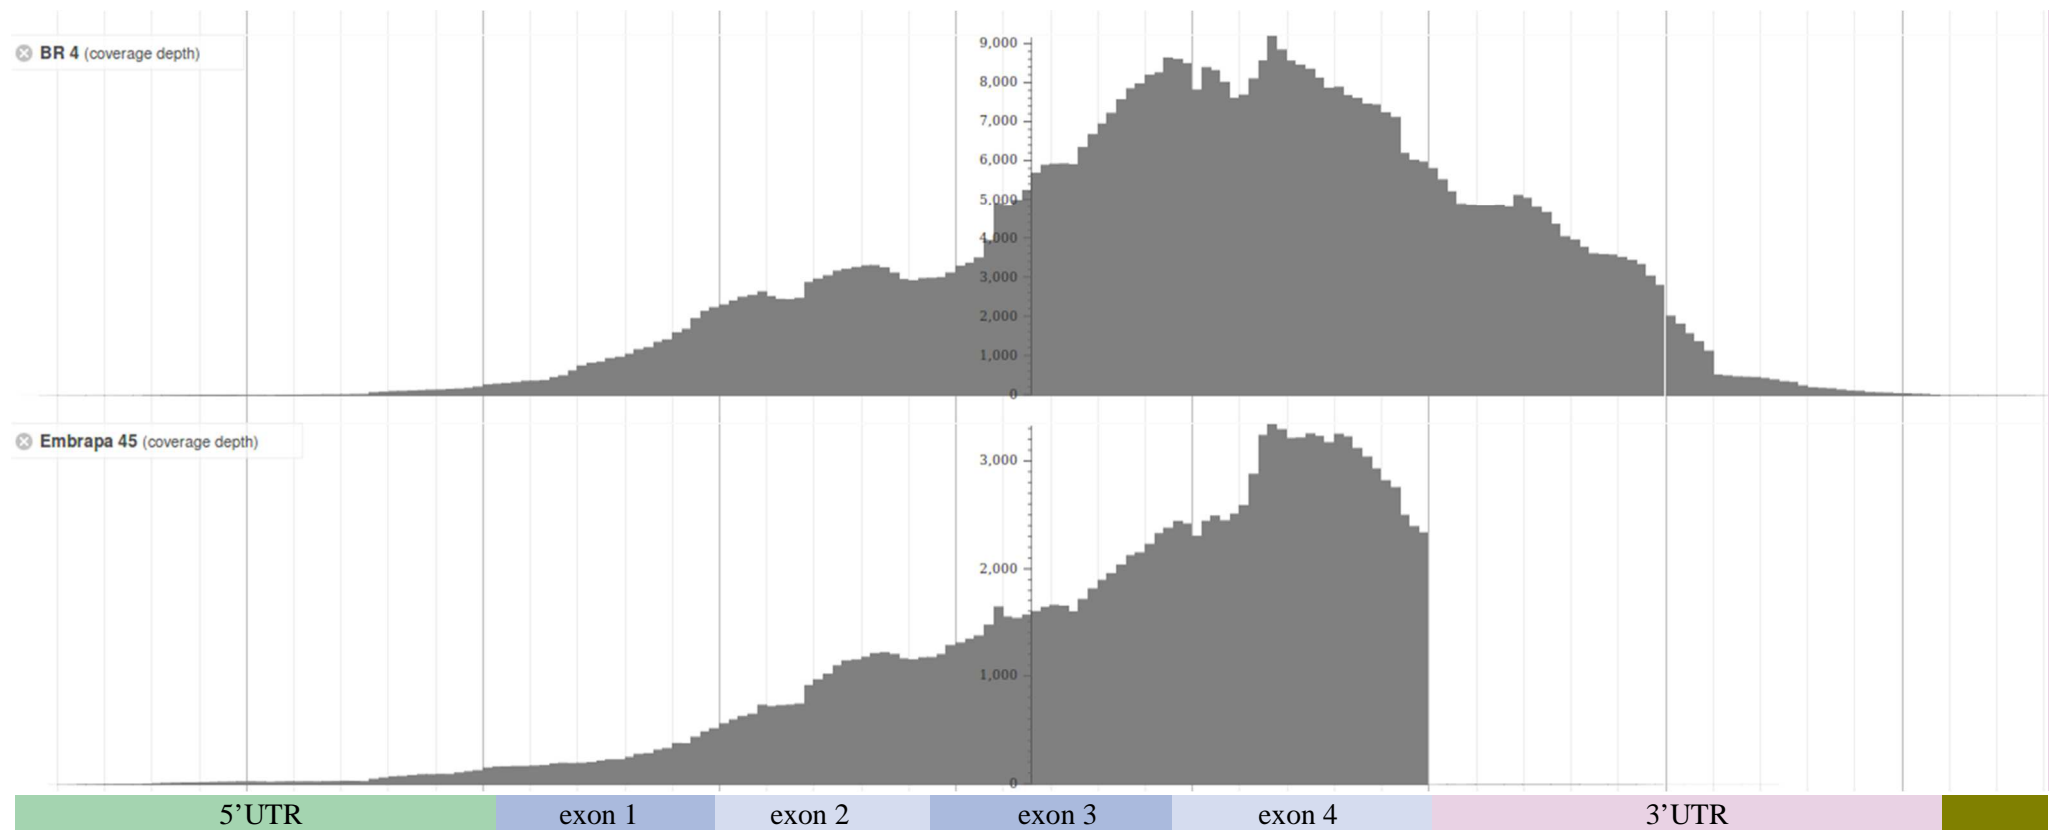

B) *De novo* assembly using Trinity.

BR 4

```

AAAAAATTACTGTTTGGATATATTCCACTATTTAGAAAGCAAATGGACTACGAAAACCTTGAGTAACAAGGTAAGCCACACAAATGGGAATGA
CTCCCCATTACAATGAAGGGCCAACCTTCATTTTCAATGAATCCCACTATAAAAACCTTTAGCAATGCAAAAAGCTAAAACATCAACCATTTCTCA
TCCACTTTCCTGGAATCACAATCCTGAAACAAAAACATCTTAGCATTAACTACTACTAGACAACATGACCACCACATTGGAAAGAGGTTTC
TCGGAAGAGCAAGAAGCTCTGGTGGTGAAGTCATGGAATGTCATGAAGAAGAATTCTGGAGAGTTGGGTCTCAAGTTTTTCTTGAAAATATTT
GAGATTGCTCCATCAGCTCAGAAATTGTTCTCATTCTTGAGAGATTCAACGGTTCCTTTGGAGCAAAAATCCCAAGCTCAAGCCCCATGCCGTGT
CTGTCTTTGTAATGACCTGTGATTTCAGCAGTTCAGCTGCGGAAGGCCGGGAAAGTCACTGTCAGAGAATCAAACCTTGAAAAAATTAGGTGCTA
CCCATTTTAGAACCGGCGTAGCAAACGAGCATTTCGAGGTGACAAAGTTTGCCTGTTGGAGACCATAAAAGAAGCTGTACCAGAAATGTGGT
CACCGGCTATGAAGAATGCATGGGGAGAAGCTTATGATCAGCTGGTCGATGCCATTAAATCTGAAATTGAACCACCCTCCTCTTAGACTCCA
GTTTAAGCAGTTCCTTTCCTTCCCTCTCAATTCTCAAATTGTTATATTAATAAAAAGTGAGAAAGTTTAGGCTTGTGCTTTTATTTTGTGTGAATGT
AATATACTTTGTGTACGTAGACTTGGCTATTGGGAGTTGCTAGGTTGGGAAGTGTTCGCATTCAACAATTCTGTAGTTGAAGGTGATTAAT
GAATTATAGCTATTTGTTTCTTATACTTATCTGCGATTCAACATAATTCTTCCCGATCACTTATGTGATTGCACCAATATCCTTTGTTGTTTTAT
GCATAACACACACGTTATGGCAAAAAGATAACCCAGTTGGACATGATT
    
```

Embrapa 45

```

AAAAAATTACTGTTTGGATATATTCCACTATTTAGAAAGCAAATGGACTACGAAAACCTTGAGTAACAAGGTAAGCCACACAAATGGGAATGA
CTCCCCATTACAATGAAGGGCCAACCTTCATTTTCAATGAATCCCACTATAAAAACCTTTAGCAATGCAAAAAGCTAAAACATCAACCATTTCTCA
TCCACTTTCCTGGAATCACAATCCTGAAACAAAAACATCTTAGCATTAACTACTACTAGACAACATGACCACCACATTGGAAAGAGGTTTC
TCGGAAGAGCAAGAAGCTCTGGTGGTGAAGTCATGGAATGTCATGAAGAAGAATTCTGGAGAGTTGGGTCTCAAGTTTTTCTTGAAAATATTT
GAGATTGCTCCATCAGCTCAGAAATTGTTCTCATTCTTGAGAGATTCAACGGTTCCTTTGGAGCAAAAATCCCAAGCTCAAGCCCCATGCCGTGT
CTGTCTTTGTAATGACCTGTGATTTCAGCAGTTCAGCTGCGGAAGGCCGGGAAAGTCACTGTCAGAGAATCAAACCTTGAAAAAATTAGGTGCTA
CCCATTTTAGAACCGGCGTAGCAAACGAGCATTTCGAGGTGACAAAGTTTGCCTGTTGGAGACCATAAAAGAAGCTGTACCAGAAATGTGGT
CACCGGCTATGAAGAATGCATGGGGAGAAGCTTATGATCAGCTGGTCGATGCCATTAAATCTGAAATTGAACCACCCTCCTCTTAGACTCCA
GTTTAAGCAGTTCCTTTCCTTCCCTCTCAATTCTCAAATTGTTATATTAATAAAAAGTGAGAAAGTTTAGGCTTGTGCTTTTATTTTGTGTGAATGT
AATATACTTTGTGTACGTAGACTTGGCTATTGGGAGTTGCTAGGTTGGGAAGTGTTCGCATTCAACAATTCTGTAGTTGAAGGTGATTAAT
GAATTATAGCTATTTGTTTCTTATACTTATCTGCGATTCAACATAATTCTTCCCGATCACTTATGTGATTGCACCAATATCCTTTGTTGTTTTAT
GCATAACACACACGTTATGGCAAAAAGATAACCCAGTTGGACATGATT
    
```

**Fig B. Structural divergence of non-symbiotic hemoglobin Glyma1g12980.1 transcript between BR 4 and Embrapa 45 cultivars by mapping (A) and *de novo* assembly (B) of reads.** (A) Glyma1g12980.1 sequence from Phytozome was used as reference for mapping. The total mapped reads for 54,174 predicted protein-coding genes in soybean genome (assembly Glyma 1.1) were 16,845,755 from BR 4 and 19,966,427 from Embrapa 45. Sequence downstream to Phytozome 3'UTR is filled of brown color. (B) Nucleotides not found by *de novo* assembly are represented by red font color. The two bold and underlined sequences are targets of qRT-PCR primer pair (Table D in S1 Supporting Information).

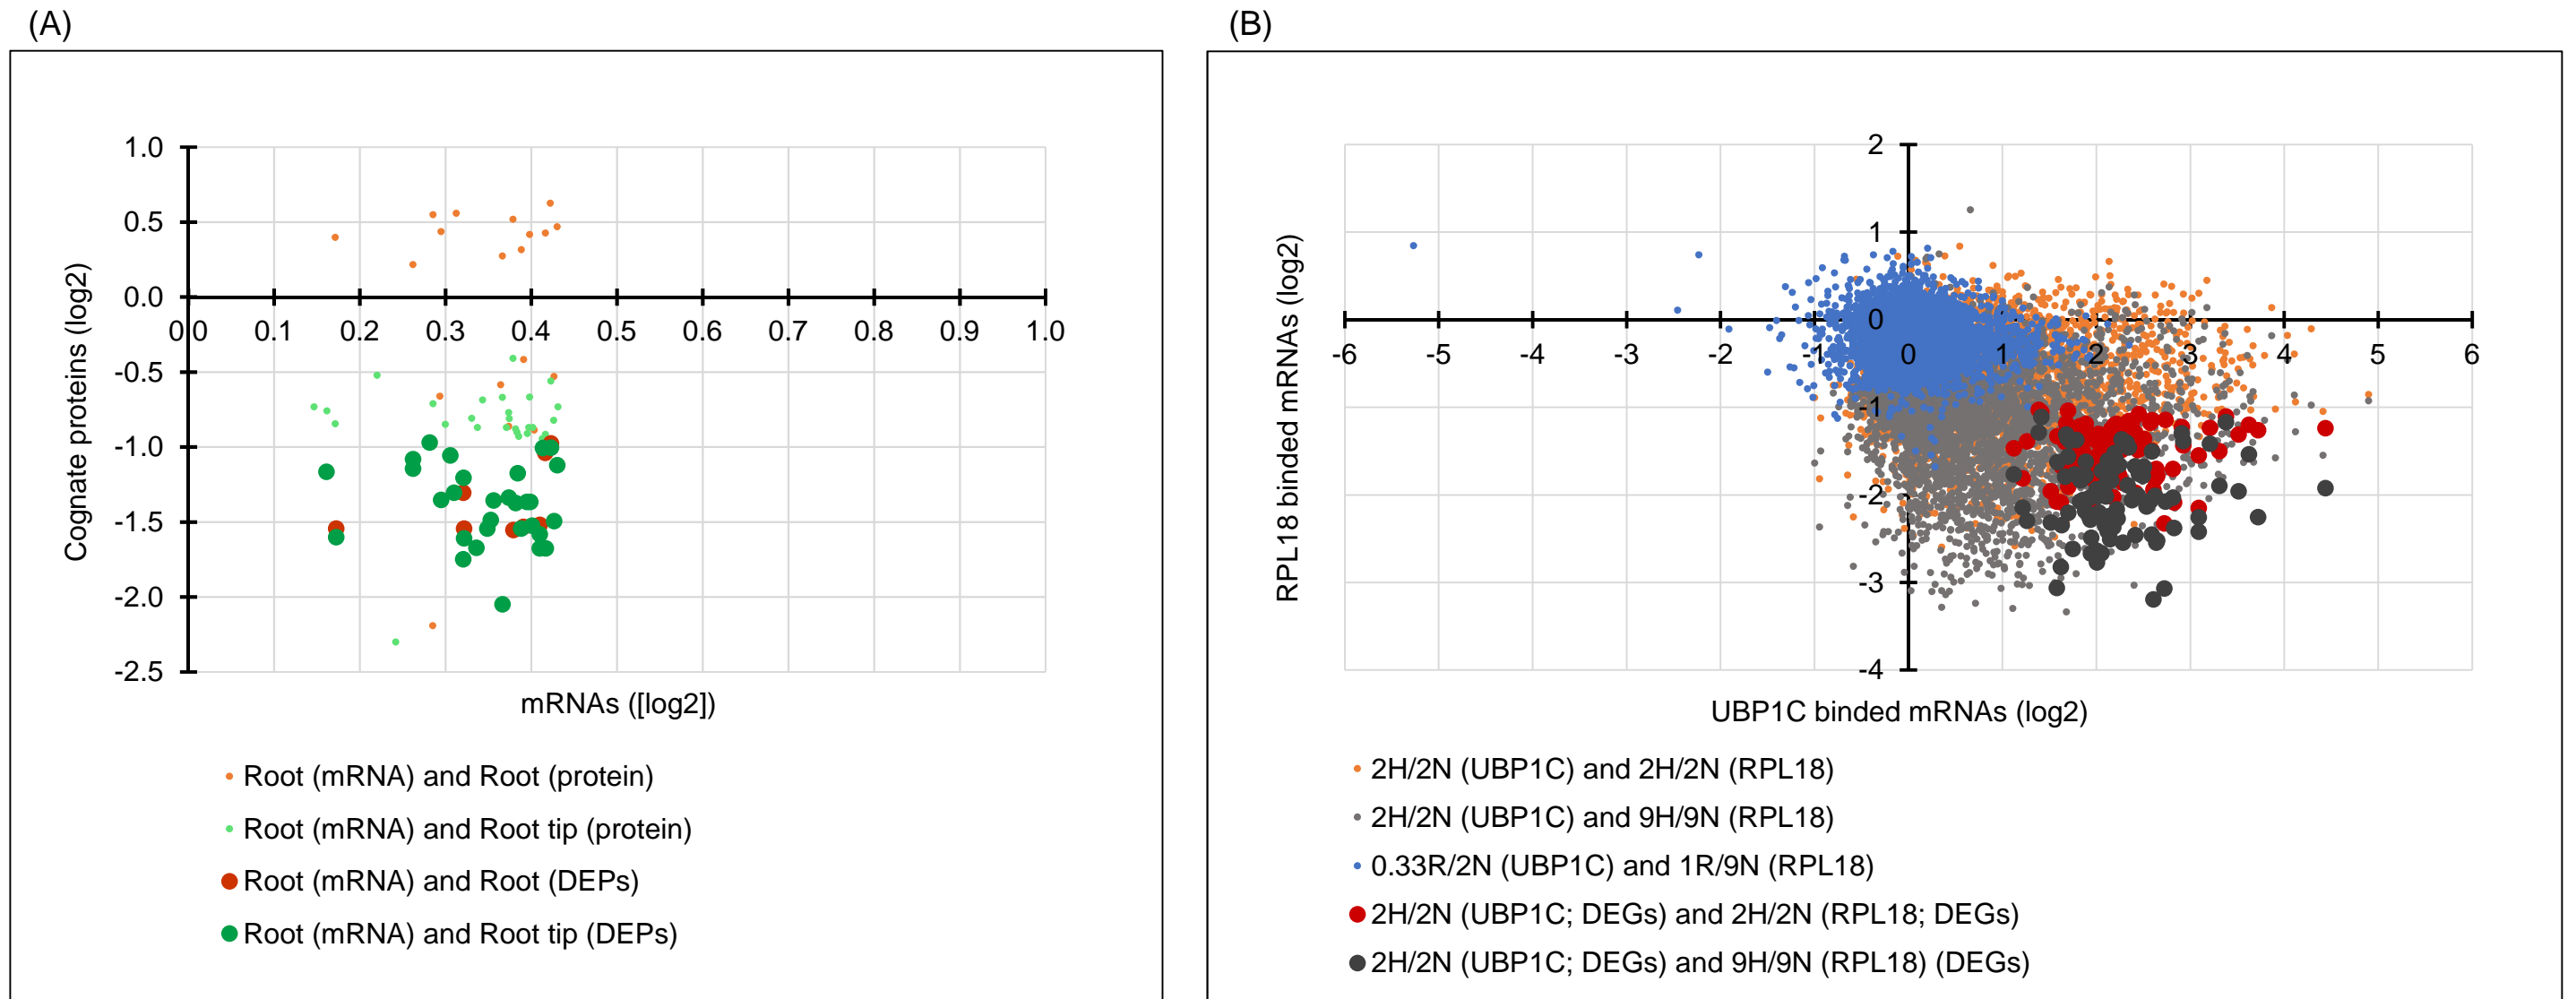

**Fig C. Steady-state stable mRNAs tend to be translationally down-regulated (A), decreasing their association with ribosomes (of which include RPL18 component) by their sequestration into stress granules (ribonucleoprotein complexes including UBPC1) under hypoxia, whereas upon reoxygenation they are rapidly released from stress granules forming new polyribosomes (B).** (A) The highest absolute fold-change values from our present top 500 steady-state stable mRNAs data (S500) were compared with fold changes from cognate proteins ( $n = 68$ ) from 2 days flooded soybean plants [79]; differentially expressed proteins (DEPs): log<sub>2</sub>-transformed fold-change  $\geq 1$  (up),  $\leq -1$  (down),  $p < 0.01$ . (B) *Arabidopsis thaliana* immunopurified ribosome and stress granule associated mRNA data sets, whose steady-state total mRNAs ( $n = 4853$ ) changed from 1.35 (log<sub>2</sub>: 0.43) to -1.35 (log<sub>2</sub>: -0.43) to hypoxia (also observed in our S500 data), were used from Branco-Price et al. [80] and Sorenson and Bailey-Serres [81] studies, respectively. 2N, 2h non-stress; 2H, 2 h hypoxia-stress; 9N, 9 h non-stress; 9H, 9 h hypoxia stress; 1R, 1 h reoxygenation after 9 h hypoxia-stress; 0.33R, 20 minutes reoxygenation after 2 h hypoxia-stress; DEGs (polyribosomes and stress granules conditions): log<sub>2</sub>-transformed fold-change  $\geq 1$  (up),  $\leq -1$  (down), adj.  $p < 0.01$ .



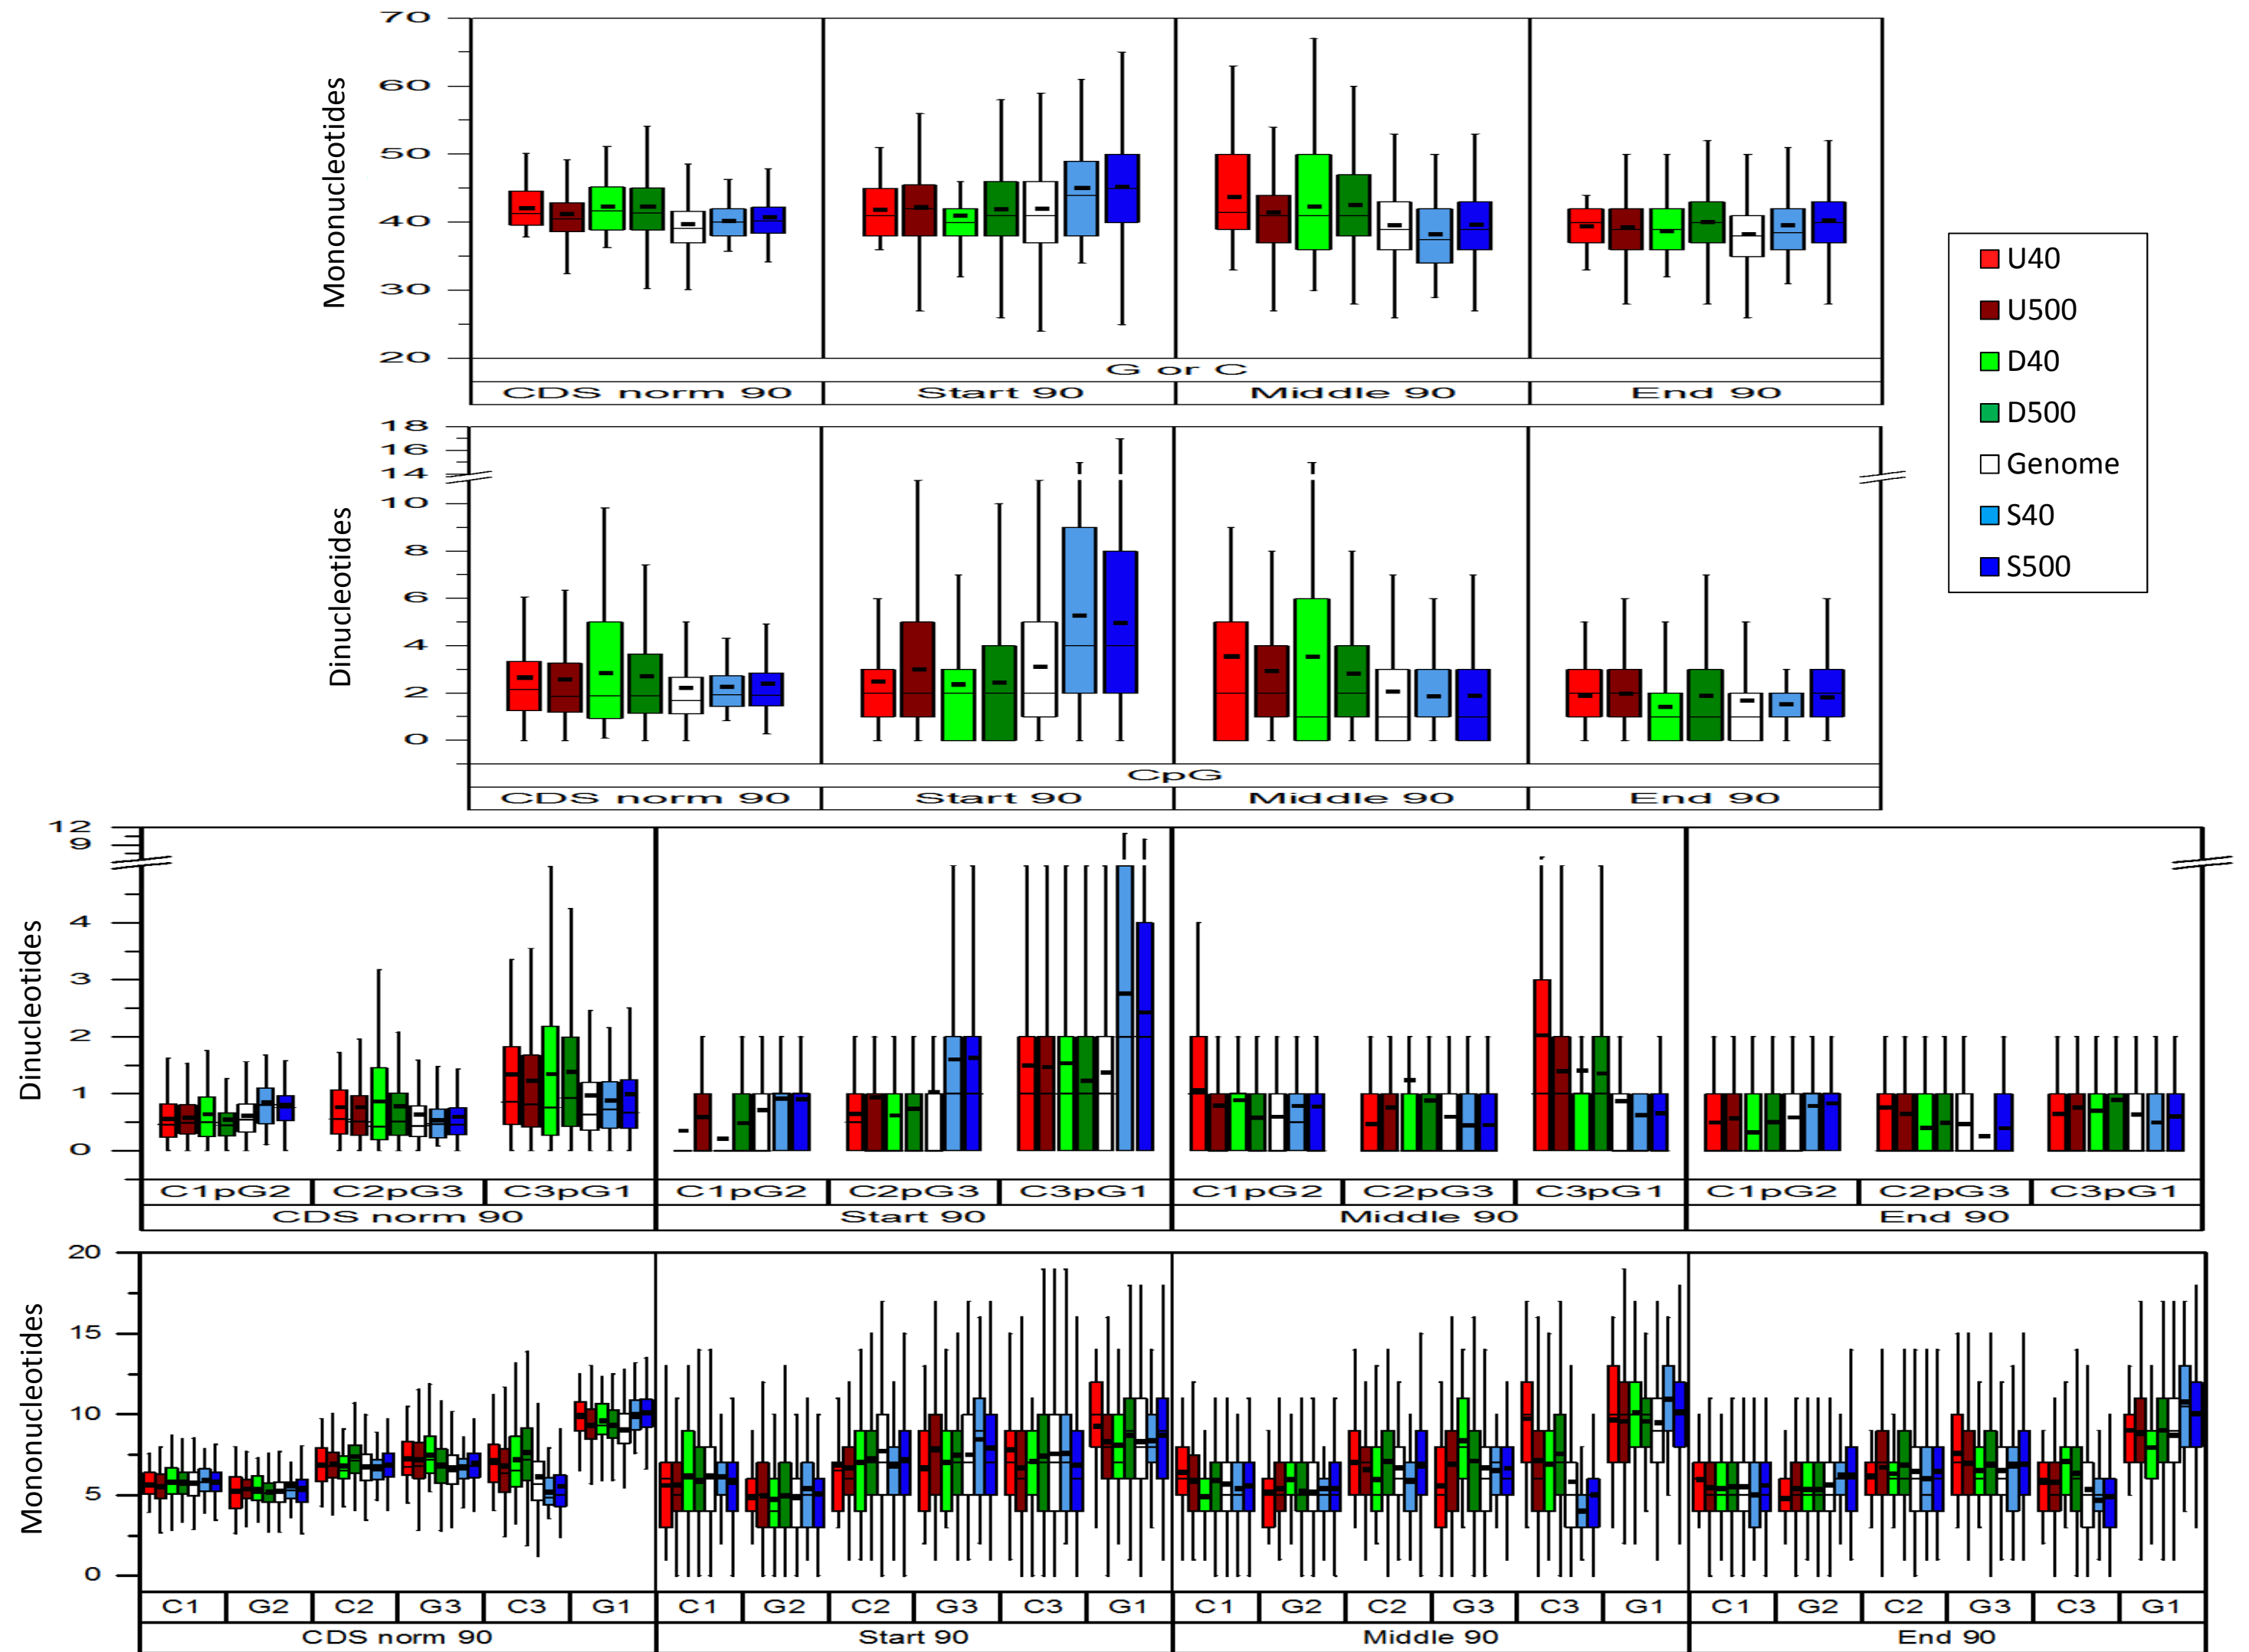

**Fig D. Compositional features for full (normalized to 90 nucleotides), start, middle, and end 90 nucleotides length from coding sequences from different soybean gene groups.** The groups are formed by top 40 and 500 ranked up- (U), down- (D), and stable-genes (S) to hypoxia, and genome. Phosphate bonds in dinucleotides are represented by “p”, and numbers are nucleotide position in codon. The box is determined by the 25th and 75th percentiles with a line as the median and a black square as the mean of the data. Error bars extend 1.5 times the interquartile range from the 25th and 75th percentiles. Statistical significance from pairwise comparisons are provided in Table C in S1 Supporting Information.

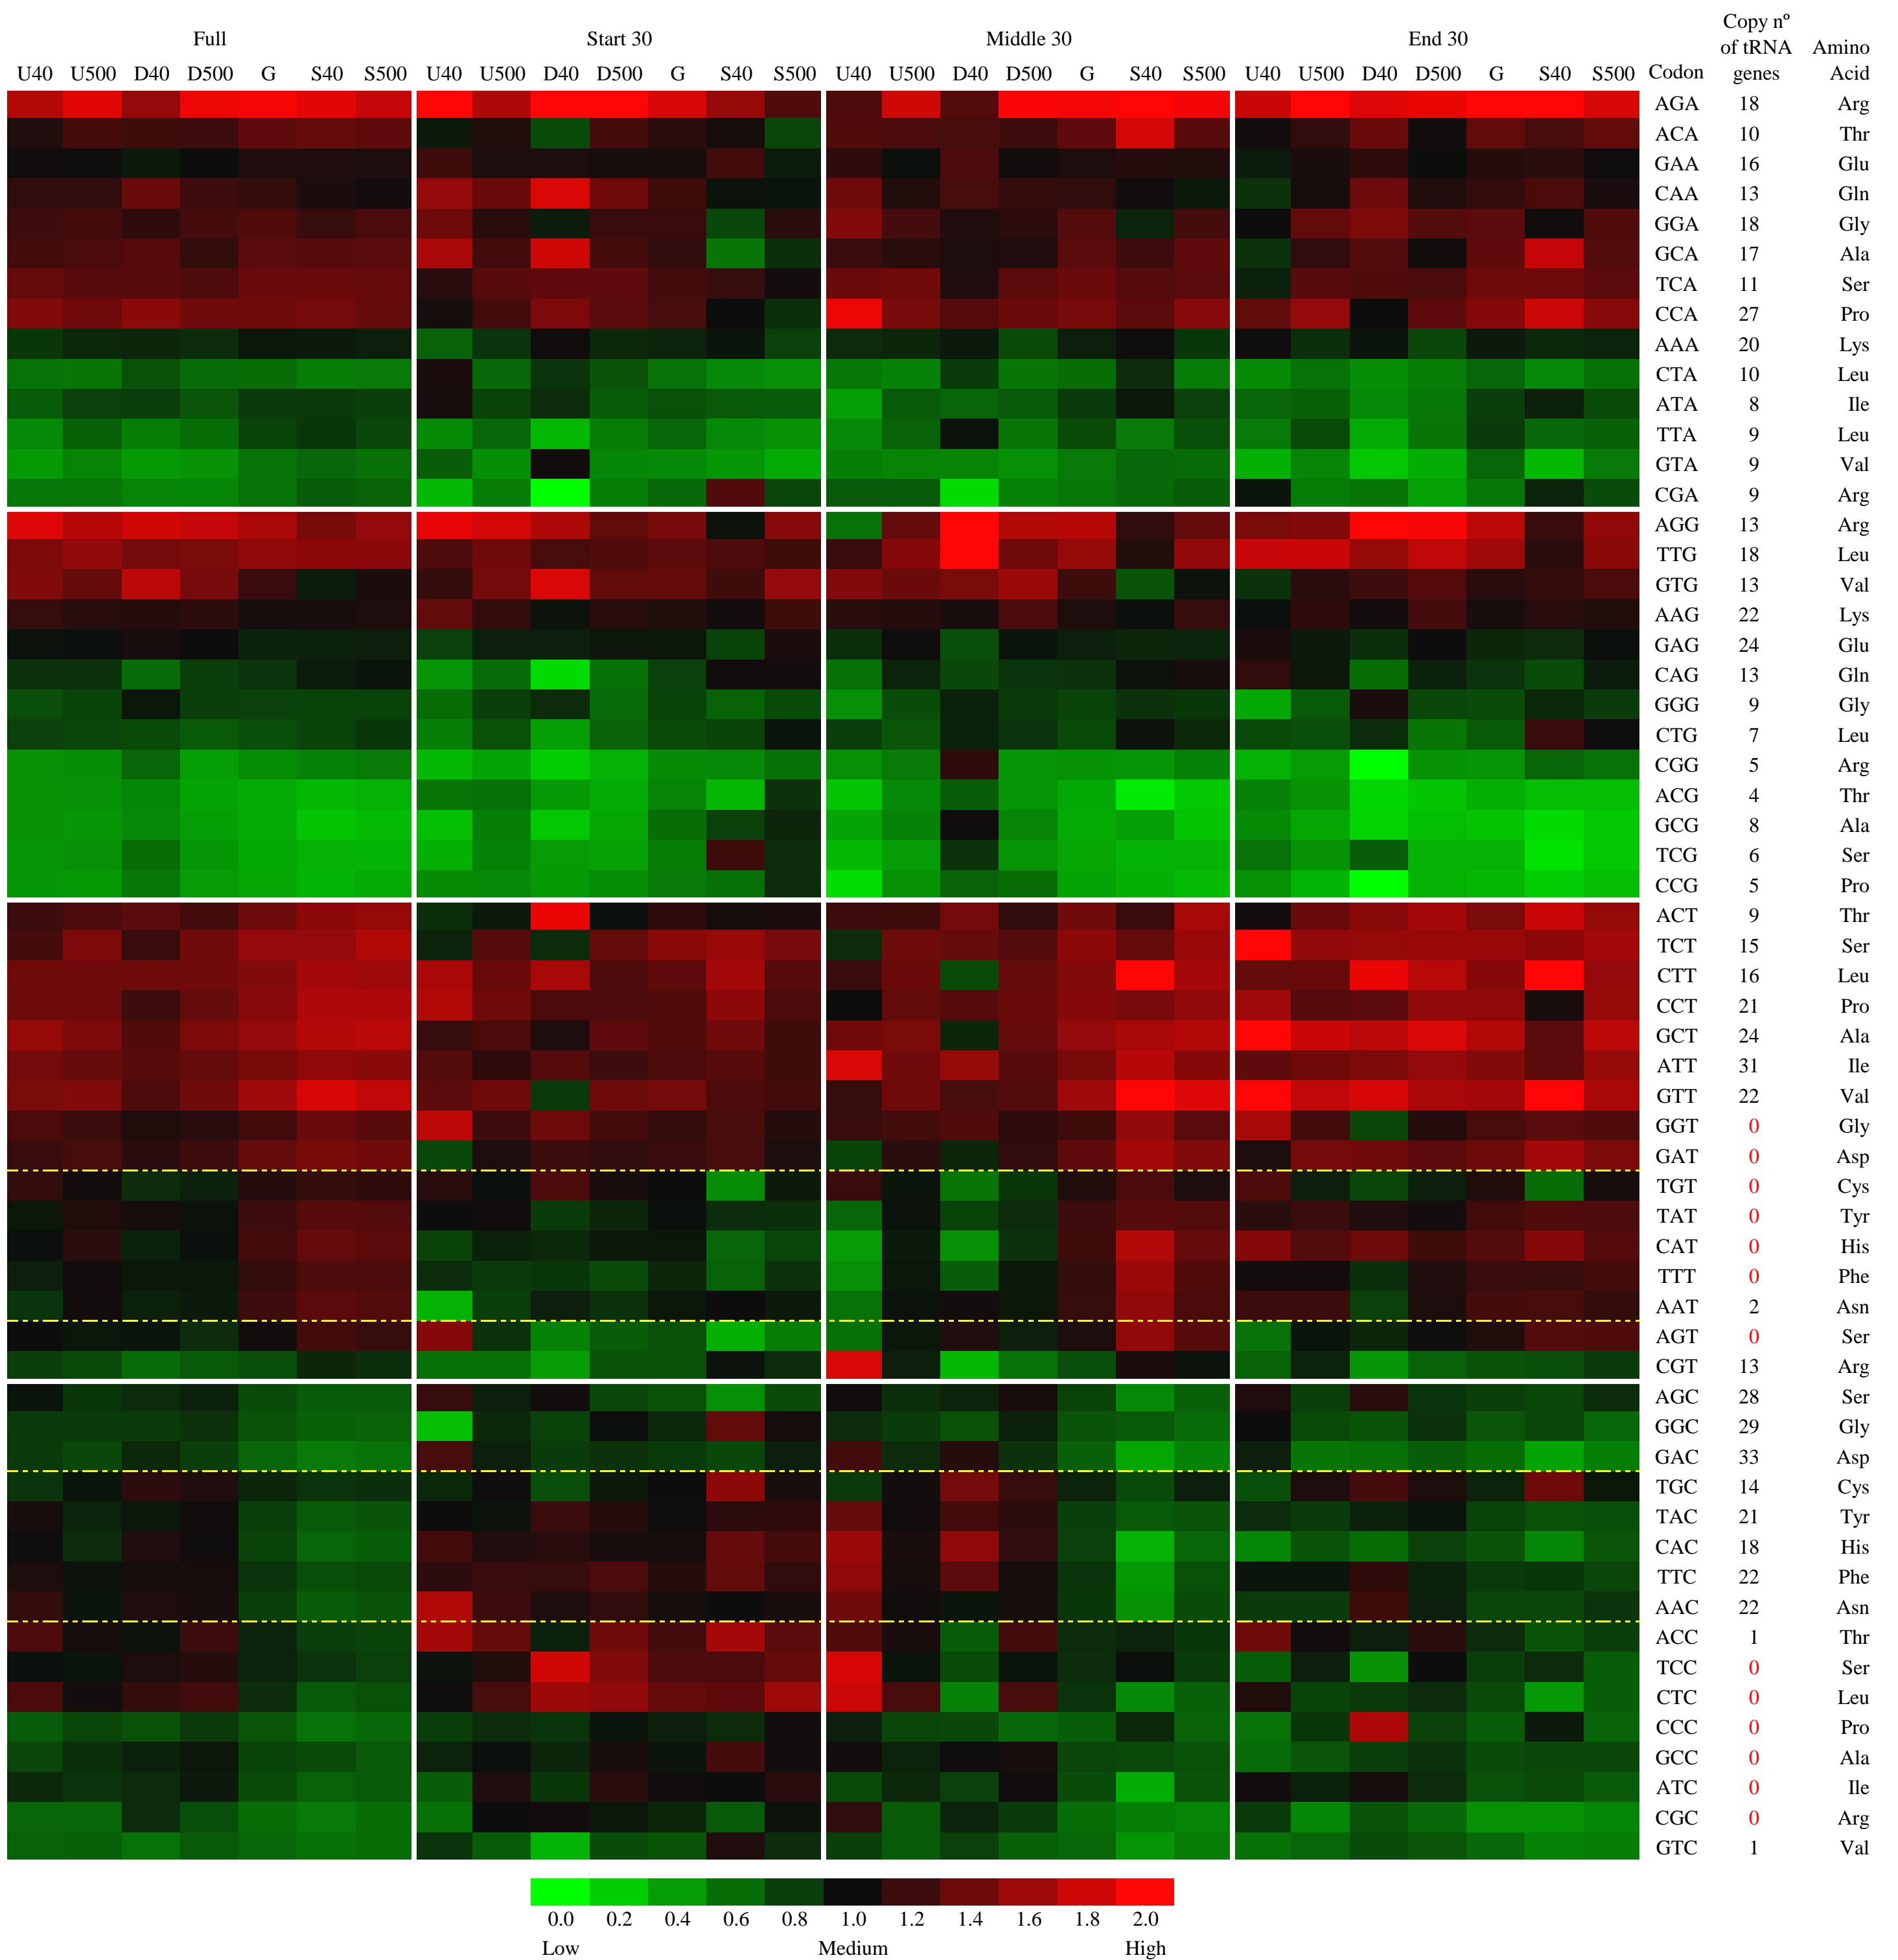

**Fig E. Heat map of RSCU (Relative Synonymous Codon Usage) for full, first, middle, and last 30 CDS (coding sequence) codons length from different soybean gene groups.** The groups are formed by top 40 and 500 ranked up- (U), down- (D), and stable-genes (S) to hypoxia, and genome (G). Asp, Cys, Tyr, His, Phe, and Asn are coding by 2-fold degenerate pyrimidine ending codons.

## References

79. Wang X, Oh M, Sakata K, Komatsu S. Gel-free/label-free proteomic analysis of root tip of soybean over time under flooding and drought stresses. *J Proteomics*. Elsevier B.V.; 2016;130: 42–55. doi:10.1016/j.jprot.2015.09.007
80. Branco-Price C, Kaiser KA, Jang CJH, Larive CK, Bailey-Serres J. Selective mRNA translation coordinates energetic and metabolic adjustments to cellular oxygen deprivation and reoxygenation in *Arabidopsis thaliana*. *Plant J*. 2008;56: 743–755. doi:10.1111/j.1365-313X.2008.03642.x
81. Sorenson R, Bailey-Serres J. Selective mRNA sequestration by OLIGOURIDYLATE-BINDING PROTEIN 1 contributes to translational control during hypoxia in *Arabidopsis*. *Proc Natl Acad Sci*. 2014;111: 2373–2378. doi:10.1073/pnas.1314851111
100. Jian B, Liu B, Bi Y, Hou W, Wu C, Han T. Validation of internal control for gene expression study in soybean by quantitative real-time PCR. *BMC Mol Biol*. 2008;14: 1–14. doi:10.1186/1471-2199-9-59
101. Byfield GE, Xue H, Upchurch RG. Two Genes from Soybean Encoding Soluble  $\Delta 9$  Stearoyl-ACP Desaturases. *Crop Sci*. 2006;46: 840. doi:10.2135/cropsci2005.06-0172
